# Supplementary material
Source: ML conference proceedings conference paper supplement (https://proceedings.mlr.press/v37/snoek15.html)
Supplement: Supplementary file 1 [file snoek15-supp.pdf]

---

# Supplementary Material for Scalable Bayesian Optimization Using Deep Neural Networks

---

Jasper Snoek\*  
Oren Rippel†\*  
Kevin Swersky§  
Ryan Kiros§  
Nadathur Satish‡  
Narayanan Sundaram‡  
Md. Mostofa Ali Patwary‡  
Prabhat\*  
Ryan P. Adams\*

JSNOEK@SEAS.HARVARD.EDU  
RIPPEL@MATH.MIT.EDU  
KSWERSKY@CS.TORONTO.EDU  
RKIROS@CS.TORONTO.EDU  
NADATHUR.RAJAGOPALAN.SATISH@INTEL.COM  
NARAYANAN.SUNDARAM@INTEL.COM  
MOSTOFA.ALI.PATWARY@INTEL.COM  
PRABHAT@LBL.GOV  
RPA@SEAS.HARVARD.EDU

\*Harvard University, School of Engineering and Applied Sciences  
†Massachusetts Institute of Technology, Department of Mathematics  
§University of Toronto, Department of Computer Science  
‡Intel Labs, Parallel Computing Lab  
\*NERSC, Lawrence Berkeley National Laboratory

## A. Convolutional neural network experiment specifications

In this section we elaborate on the details of the network architecture, training and the meta-optimization. In the following subsections we elaborate on the hyperparameterization scheme. The priors on the hyperparameters as well as their optimal configurations for the two datasets can be found in Table 2.

### A.1. Architecture

The model architecture is specified in Table 1.

### A.2. Data augmentation

We corrupt each input in a number of ways. Below we describe our parametrization of these corruptions.

**HSV** We shift the hue, saturation and value fields of each input by global constants  $b_H \sim U(-B_H, B_H)$ ,  $b_S \sim U(-B_S, B_S)$ ,  $b_V \sim U(-B_V, B_V)$ . Similarly, we globally stretch the saturation and value fields by global constants  $a_S \sim U(\frac{1}{1+A_S}, 1 + A_S)$ ,  $a_V \sim U(\frac{1}{1+A_V}, 1 + A_V)$ .

**Scalings** Each input is scaled by some factor  $s \sim U(\frac{1}{1+S}, 1 + S)$ .

**Translations** We crop each input to size  $27 \times 27$ , where the window is chosen randomly and uniformly.

| Layer type       | # Filters | Window       | Stride |
|------------------|-----------|--------------|--------|
| Convolution      | 96        | $3 \times 3$ |        |
| Convolution      | 96        | $3 \times 3$ |        |
| Max pooling      |           | $3 \times 3$ | 2      |
| Convolution      | 192       | $3 \times 3$ |        |
| Convolution      | 192       | $3 \times 3$ |        |
| Convolution      | 192       | $3 \times 3$ |        |
| Max pooling      |           | $3 \times 3$ | 2      |
| Convolution      | 192       | $3 \times 3$ |        |
| Convolution      | 192       | $1 \times 1$ |        |
| Convolution      | 10/100    | $1 \times 1$ |        |
| Global averaging |           | $6 \times 6$ |        |
| Softmax          |           |              |        |

Table 1. Our convolutional neural network architecture. This choice was chosen to be maximally generic. Each convolution layer is followed by a ReLU nonlinearity.

**Horizontal reflections** Each input is reflected horizontally with a probability of 0.5.

**Pixel dropout** Each input element is dropped independently and identically with some random probability  $D_0$ .

### A.3. Initialization and training procedure

We initialize the weights of each convolution layer  $m$  with i.i.d zero-mean Gaussians with standard devia-

tion  $\frac{\sigma}{\sqrt{F_m}}$  where  $F_m$  is the number of parameters per filter for that layer. We chose this parametrization to produce activations whose variances are invariant to filter dimensionality. We use the same standard deviation for all layers but the input, for which we dedicate its own hyperparameter  $\sigma_I$  as it oftentimes varies in scale from deeper layers in the network.

We train the model using the standard stochastic gradient descent and momentum optimizer. We use mini-batch size of 128, and tune the momentum and learning rate, which we parametrize as  $1 - 0.1^M$  and  $0.1^L$  respectively. We anneal the learning rate by a factor of 0.1 at epochs 130 and 190. We terminate the training after 200 epochs.

We regularize the weights of all layers with weight decay coefficient  $W$ . We apply dropout on the outputs of the max pooling layers, and tune these rates  $D_1, D_2$  separately.

#### A.4. Testing procedure

We evaluate the performance of the learned model by averaging its log-probability predictions on 100 samples drawn from the input corruption distribution, with masks drawn from the unit dropout distribution.

## B. Additional figures for image caption generation

In Figures 1(a) and 1(b) we provide some additional visualization of the results from the image caption generation experiments from Section 4.2 to highlight the behavior of the Bayesian optimization routine. Both figures show the validation BLEU-4 Score on MS COCO corresponding to different hyperparameter configurations as evaluated over iterations of the optimization procedure. In Figure 1(a), these are represented as a planar histogram, where the shade of each bin indicates the total count within it. The current best validation score discovered is traced in black. Figure 1(b) shows a scatter plot of the validation score of all the experiments in the order in which they finished. Validation scores of 0 correspond to constraint violations. These figures demonstrate the exploration-versus-exploitation paradigm of Bayesian Optimization, in which the algorithm trades off visiting unexplored parts of the space, and focusing on parts which show promise.

## C. Multimodal neural language model hyperparameters

### C.1. Description of the hyperparameters

We optimize a total of 11 hyperparameters of the log-bilinear model (LBL). Below we explain what these hyperparameters refer to.

**Model** The LBL model has two variants, an additive model where the image features are incorporated via an additive bias term, and a multiplicative that uses a factored weight tensor to control the interaction between modalities.

**Context size** The goal of the LBL is to predict the next word given a sequence of words. The context size dictates the number of words in this sequence.

**Learning rate, momentum, batch size** These are optimization parameters used during stochastic gradient learning of the LBL model parameters. The optimization over learning rate is carried out in log-space, but the proposed learning rate is exponentiated before being passed to the training procedure.

**Hidden layer size** This controls the size of the joint hidden representation for words and images.

**Embedding size** Words are represented by feature embeddings rather than one-hot vectors. This is the dimensionality of the embedding.

**Dropout** A regularization parameter that determines the amount of dropout to be added to the hidden layer.

**Context decay, Word decay**  $\mathcal{L}_2$  regularization on the input and output weights respectively. Like the learning rate, these are optimized in log-space as they vary over several orders of magnitude.

**Factors** The rank of the weight tensor. Only relevant for the multiplicative model.

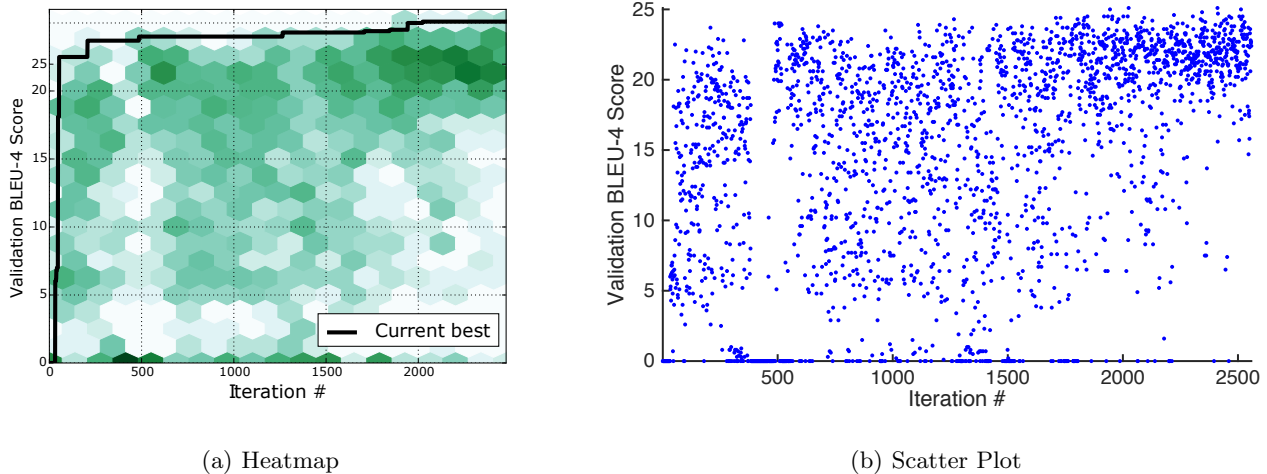

Figure 1. Validation BLEU-4 Score on MS COCO corresponding to different hyperparameter configurations as evaluated over time. In Figure 1(a), these are represented as a planar histogram, where the shade of each bin indicates the total count within it. The current best validation score discovered is traced in black. Figure 1(b) shows a scatter plot of the validation score of all the experiments in the order in which they finished. This projection demonstrates the exploration-versus-exploitation paradigm of Bayesian Optimization, in which the algorithm trades off visiting unexplored parts of the space, and focusing on parts which show promise.

| Hyperparameter                 | Notation   | Support of prior | CIFAR-10 Optimum | CIFAR-100 Optimum |
|--------------------------------|------------|------------------|------------------|-------------------|
| Momentum                       | $M$        | [0.5, 2]         | 1.6242           | 1.3339            |
| Learning rate                  | $L$        | [1, 4]           | 2.7773           | 2.1205            |
| Initialization deviation       | $\sigma_I$ | [0.5, 1.5]       | 0.83359          | 1.5570            |
| Input initialization deviation | $\sigma$   | [0.01, 1]        | 0.025370         | 0.13556           |
| Hue shift                      | $B_H$      | [0, 45]          | 31.992           | 19.282            |
| Saturation scale               | $A_S$      | [0, 0.5]         | 0.31640          | 0.30780           |
| Saturation shift               | $B_S$      | [0, 0.5]         | 0.10546          | 0.14695           |
| Value scale                    | $A_S$      | [0, 0.5]         | 0.13671          | 0.13668           |
| Value shift                    | $B_S$      | [0, 0.5]         | 0.24140          | 0.010960          |
| Pixel dropout                  | $D_0$      | [0, 0.3]         | 0.19921          | 0.00056598        |
| Scaling                        | $S$        | [0, 0.3]         | 0.24140          | 0.12463           |
| L2 weight decay                | $W$        | [2, 5]           | 4.2734           | 3.1133            |
| Dropout 1                      | $D_1$      | [0, 0.7]         | 0.082031         | 0.081494          |
| Dropout 2                      | $D_2$      | [0, 0.7]         | 0.67265          | 0.38364           |

Table 2. Specification of the hyperparametrization scheme, and optimal hyperparameter configurations found.

| Hyperparameter    | Support of prior          | Notes                     | COCO Optimum   |
|-------------------|---------------------------|---------------------------|----------------|
| Model             | {additive,multiplicative} |                           | additive       |
| Context size      | [3, 25]                   |                           | 5              |
| Learning rate     | [0.001, 10]               | Log-space                 | 0.43193        |
| Momentum          | [0, 0.9]                  |                           | 0.23269        |
| Batch size        | [20, 200]                 |                           | 40             |
| Hidden layer size | [100, 2000]               |                           | 441            |
| Embedding size    | {50, 100, 200}            |                           | 100            |
| Dropout           | [0, 0.7]                  |                           | 0.14847        |
| Word decay        | [ $10^{-9}$ , $10^{-3}$ ] | Log-space                 | $2.98456^{-7}$ |
| Context decay     | [ $10^{-9}$ , $10^{-3}$ ] | Log-space                 | $1.09181^{-8}$ |
| Factors           | [50, 200]                 | Multiplicative model only | -              |

Table 3. Specification of the hyperparametrization scheme, and optimal hyperparameter configurations found for the multimodal neural language model. For parameters marked log-space, the log is given to the Bayesian optimization routine and the result is exponentiated before being passed into the multimodal neural language model for training. Square brackets denote a range of parameters, while curly braces denote a set of options.
